# Supplementary material
Source: HighWire-hosted journal article supplement (https://www.cmajopen.ca/highwire/filestream/87851/field_highwire_adjunct_files/1/open-2021-0239-coreq-checklist.pdf)
Supplement: open-2021-0239-coreq-checklist.pdf [file open-2021-0239-coreq-checklist.pdf]

Consolidated criteria for reporting qualitative studies (COREQ): 32-item checklist

Clinician Interviews Highlight Harm Reduction as an Ethics Priority for Authorizing Medical Cannabis in the Care of Youth, Gunning et al., (2021).

| Number                                         | Item                                     | Page                                                                                        |
|------------------------------------------------|------------------------------------------|---------------------------------------------------------------------------------------------|
| <b>Domain 1: Research team and reflexivity</b> |                                          |                                                                                             |
| Personal Characteristics                       |                                          |                                                                                             |
| 1                                              | Interviewer/facilitator                  | Contributor's statement (p.3)<br>Methods (p.7)                                              |
| 2                                              | Credentials                              | Title page (p.1)                                                                            |
| 3                                              | Occupation                               | Title page (p.1)<br>Methods (p.7)                                                           |
| 4                                              | Gender                                   | Contributor's statement (p.3)                                                               |
| 5                                              | Experience and training                  | Title page (p.1)                                                                            |
| Relationship with participants                 |                                          |                                                                                             |
| 6                                              | Relationship established                 | Methods (p.7)                                                                               |
| 7                                              | Participant knowledge of the interviewer | Methods (p.7)                                                                               |
| 8                                              | Interviewer characteristics              | Contributor's statement (p.3)<br>Introduction (p.6)<br>Methods (p.7)<br>Limitations (p. 15) |
| <b>Domain 2: Study design</b>                  |                                          |                                                                                             |
| Theoretical framework                          |                                          |                                                                                             |
| 9                                              | Methodological orientation and theory    | Methods (p.7)                                                                               |
| Participant selection                          |                                          |                                                                                             |
| 10                                             | Sampling                                 | Methods (p.7)                                                                               |
| 11                                             | Method of approach                       | Methods (p.7)                                                                               |
| 12                                             | Sample size                              | Results (p.8)                                                                               |
| 13                                             | Non-participation                        | Methods (p.7)                                                                               |
| Setting                                        |                                          |                                                                                             |
| 14                                             | Setting of data collection               | Methods (p.7)                                                                               |
| 15                                             | Presence of non-participants             | Methods (p.7)                                                                               |
| 16                                             | Description of sample                    | Methods (p.7)<br>Results (p.8)                                                              |
| Data collection                                |                                          |                                                                                             |
| 17                                             | Interview guide                          | Methods (p.7)<br>Appendix                                                                   |
| 18                                             | Repeat interviews                        | Methods (p.7)                                                                               |
| 19                                             | Audio/visual recording                   | Methods (p.7)                                                                               |
| 20                                             | Field notes                              | Methods (p.7)                                                                               |

|                                       |                              |                     |
|---------------------------------------|------------------------------|---------------------|
| 21                                    | Duration                     | Results (p. 8)      |
| 22                                    | Data saturation              | Methods (p. 7)      |
| 23                                    | Transcripts returned         | Limitations (p. 15) |
| <b>Doman 3: Analysis and findings</b> |                              |                     |
| Data analysis                         |                              |                     |
| 24                                    | Number of data coders        | Methods (p. 7,8)    |
| 25                                    | Description of coding tree   | Results             |
| 26                                    | Derivation of themes         | Methods (p. 7,8)    |
| 27                                    | Software                     | Methods (p. 7)      |
| 28                                    | Participant checking         | Limitations (p. 15) |
| Reporting                             |                              |                     |
| 29                                    | Quotations presented         | Results             |
| 30                                    | Data and findings consistent | Results             |
| 31                                    | Clarity of major themes      | Results             |
| 32                                    | Clarity of minor themes      | Results             |
